# Supplementary material
Source: PubMed Central journal article supplement (PMC6731412)
Supplement: ajtr0011-4761-f8.pdf [file ajtr0011-4761-f8.pdf]

## TINCR involves in lung adenocarcinoma

**Supplementary Table 1.** The list of 46 potential targets of miR-107

---

| Gene name |
|-----------|
| RUNX1T1   |
| DCBLD2    |
| DICER1    |
| ZNRF3     |
| PCGF5     |
| CDK14     |
| MBNL1     |
| CDK5R1    |
| EIF5      |
| HNRNPA2B1 |
| PEG10     |
| SIK2      |
| NFIA      |
| BTG2      |
| CPEB3     |
| MAP4      |
| RBM24     |
| SLAIN2    |
| RDH10     |
| YWHAH     |
| BTRC      |
| MTMR4     |
| SATB2     |
| CXorf23   |
| SNX3      |
| KIF23     |
| FBXW7     |
| GPATCH8   |
| RASSF5    |
| DCUN1D4   |
| COPS2     |
| ZNF449    |
| ZNRF2     |
| MYB       |
| CC2D1B    |
| BDNF      |
| GPCPD1    |
| MEF2D     |
| PIK3R1    |
| RAB11FIP2 |
| SNRK      |
| BSDC1     |
| ARNT      |
| FAM81A    |
| ZC3H12C   |
| SIPA1L2   |

---

## TINCR involves in lung adenocarcinoma

**Supplementary Table 2.** The list of 474 potential targets of miR-1286

---

| Gene name |
|-----------|
| MAFB      |
| ALPK1     |
| NFAT5     |
| FBXO11    |
| MAP1B     |
| SOGA1     |
| ATP8B2    |
| SEC24C    |
| BACH2     |
| PURB      |
| VDAC3     |
| HIF1AN    |
| ACIN1     |
| PCDH17    |
| SON       |
| TSPAN11   |
| MYD88     |
| UBQLN1    |
| ABHD16A   |
| USP42     |
| TAF5L     |
| DRC1      |
| CHIA      |
| IPCEF1    |
| HNRNPK    |
| PCSK6     |
| STK16     |
| KLF12     |
| RAB14     |
| STOML1    |
| PITPNM3   |
| GAS7      |
| ASPH      |
| SLC35A4   |
| CHIC1     |
| RASSF5    |
| LARP1     |
| IGSF9B    |
| C16orf47  |
| C20orf197 |
| DYNAP     |
| NCS1      |
| ZNF423    |
| ARHGEF3   |
| SIPA1L1   |
| CHST5     |

## TINCR involves in lung adenocarcinoma

SDR39U1  
PLIN5  
MICAL2  
PHYHIP  
SF3A1  
RAB5B  
DIRAS1  
GDF2  
KDM6B  
CDC42BPB  
LETMD1  
RORB  
ZNF562  
ARAP2  
DEK  
SSH1  
ZDHHC15  
DGKI  
SLC39A10  
CAMKK1  
BCAP29  
MAGEC2  
CD47  
NEK9  
WNT1  
PPME1  
DDX11  
PLXNA4  
FBXO41  
ATXN1  
MMP16  
PITPNB  
ABL2  
SLC24A4  
TH  
AP3B1  
RIMS3  
SERTAD2  
KCNE1  
TUFT1  
PRRG1  
NPHS1  
F8  
NFASC  
OASL  
BAZ1B  
PIK3C2A  
PAPOLB  
CNTNAP1

## TINCR involves in lung adenocarcinoma

FAM49B  
DDB2  
RAB35  
UNC5C  
DCUN1D2  
TEAD1  
ASF1B  
RAB11FIP1  
FAAH  
CNOT2  
CCNYL1  
SYT4  
MRPL22  
ATXN1L  
PTPRJ  
FAM155B  
WNK3  
SNTG2  
DDX55  
TNRC6C  
TMEM132E  
RB1CC1  
RBM14  
NAT9  
DBNDD1  
TXNDC17  
CHRD  
SKIDA1  
KIAA0930  
MIEF2  
LGALS1  
NOS1  
LIMA1  
ARL4C  
NUDT7  
AVPR2  
WARS  
CECR2  
EBF2  
ITPR2  
APPBP2  
UVRAG  
PCP4  
POM121  
CPLX1  
RASGEF1B  
STIM2  
CDCA5  
SEC14L1

## TINCR involves in lung adenocarcinoma

TLK1  
ATP13A3  
PHLDA3  
SYVN1  
BCL7A  
NTNG2  
NCOR1  
CTSO  
TMUB2  
MAML2  
DVL3  
CCDC85C  
CCNK  
OPRK1  
FOXP1  
C19orf12  
MAVS  
PTPN5  
ARL10  
SAMD12  
MEF2C  
ZNF543  
TMEM201  
NGB  
MAP3K7  
RUNX1  
CCR9  
FAIM2  
RCL1  
NAIP  
KIF21B  
CHAF1A  
PSMA5  
EGLN3  
CDKN2A  
ZNF609  
CAPZA1  
FBXL19  
TPCN2  
PCYT1B  
CNTD1  
CAB39L  
ATP11A  
KRTAP5-7  
AFF2  
THRAP3  
SMOX  
SH2D4B  
PCGF5

## TINCR involves in lung adenocarcinoma

KRTAP5-9  
ZNRF1  
IDH3G  
KIAA1143  
CAMKV  
PXDC1  
CD68  
ABHD15  
PRDM15  
NMNAT2  
MTMR9  
BTBD7  
CALCA  
RORA  
ASH1L  
MYO9A  
MED13L  
DOCK3  
ABCB9  
CSTF3  
MAP3K11  
KCNK3  
TSPAN9  
SLC7A14  
ZAP70  
AGO1  
DAO  
CSNK2B  
HPCAL4  
VPS26A  
VPREB1  
SLC38A1  
PLEKHB2  
SETD2  
ELAVL2  
GATA3  
GALNT2  
EXOSC2  
GRIK3  
PPP1R16A  
KDM5B  
PLA2G4C  
ADPRHL1  
PIK3AP1  
RD3  
SH3KBP1  
VANGL1  
ABHD14A  
OTUD4

## TINCR involves in lung adenocarcinoma

HMGN1  
RABAC1  
PIAS2  
PISD  
ATRN  
RCC1  
DPT  
ZMAT3  
USP3  
ARSJ  
ATP6AP1  
DDX52  
ICMT  
CHEK1  
RSL24D1  
DOLPP1  
IL2RB  
CD6  
TRIM39  
KLHL36  
KLF3  
DNAJC13  
LRPPRC  
ALKBH1  
STOML3  
NTNG1  
ATF2  
GPATCH2  
FCRLA  
DDHD2  
TMEM217  
NFATC2  
DLG2  
RPS27L  
PXT1  
ASCC2  
TMSB4Y  
SLC26A4  
KRT79  
INSR  
MR1  
CPA4  
MMP8  
AMOTL1  
ZNF770  
ADAMTS19  
AMER1  
GMFB  
SMIM12

## TINCR involves in lung adenocarcinoma

DOCK4  
TSPEAR  
GAB3  
KCNAB2  
SWAP70  
TSHR  
CDS2  
AAR2  
TRHDE  
MLXIP  
PREP  
CRISPLD1  
FARSB  
DPM2  
NICN1  
LCT  
PTPRN2  
SYNPO  
ZFYVE27  
FHL1  
REG1B  
STON1  
TMEM107  
TMEM198  
STAT5B  
SDK2  
PNPLA5  
HECA  
SCRN1  
APOLD1  
HIPK1  
HNRNPUL2  
APOC3  
GNAS  
USP24  
PMPCB  
ROBO2  
CTTNBP2NL  
ELAC1  
TFCP2L1  
TNNI1  
XIRP1  
SPATA5  
AP2A2  
MFAP4  
COBL  
MGRN1  
PRR16  
HOPX



## TINCR involves in lung adenocarcinoma

CASK  
IGDCC3  
CDK5R1  
CASP2  
BEST2  
BSN  
MCM4  
SLC48A1  
LDLRAD2  
NOTCH3  
BRD4  
NLRC5  
NIPSNAP1  
FAM102A  
SLC4A4  
GTF3C4  
FASN  
NAP1L4  
FZD1  
PACS2  
ACER1  
C1orf226  
PHC1  
TIPIN  
ZFP41  
EGLN2  
FBX04  
ORAI1  
IRF8  
EBPL  
ITPR3  
ALPK3  
NF2  
SZT2  
GJA3  
GABBR2  
P4HA1  
IGF2  
MAP3K9  
TBC1D5  
MATN1  
SPATA13  
TMEM170B  
XPNPEP3  
CHD2  
CNR1  
GPR158  
CRNN  
CHTF8

## TINCR involves in lung adenocarcinoma

ZIC5  
FGF17  
TAOK1  
RPS6KA1  
FASLG  
AKNA  
PNRC2  
MMP10  
CMTM4  
LARS  
IFITM2  
GOLGA7B  
ST3GAL1  
STX16  
ACVR2B  
GRIN2A  
MMEL1  
CXorf40B  
REEP3  
POLE  
ZNF736  
MBNL2  
IL12RB1  
S1PR2  
ACOX3  
SHISA6  
EMCN  
WIPF2  
TMEM64  
WIPI2  
RPL10  
CAMK1D  
SLC24A2  
ELFN2  
GSK3B  
CAMK2A  
ENTPD6  
FZD8  
SLC6A3  
GGA2  
TUBGCP3  
NLK  
LRP2  
CEACAM1  
ZMAT2  
ADARB1  
VPS53  
COX6B2  
CNRIP1

## TINCR involves in lung adenocarcinoma

MTA3  
TBC1D1  
GOLGA1  
LIN28A  
SCAMP2  
SH3BP2  
PANK2  
VAMP1  
RNF115  
AMMECR1L  
AK4  
GAP43  
GALNTL6  
GNPDA1  
FER  
PIK3R5  
BIRC3  
NCKIPSD  
GSG1  
SIAH3  
CYTH3  
DCAF7  
TRIM25  
GAL3ST3  
REPS2  
CWC25  
HPCA  
ZFYVE1  
GPR63  
GAS8  
RAB3D  
MXD1  
TMEM33  
MTMR3  
CYBB  
HESX1

---
